# Supplementary material
Source: Research Square preprint supplement (doi:10.21203/rs.3.rs-9659016/v1)
Supplement: Supplementary file 1 [file 6b80c71537fc7bebcba526fc.docx]

**Supporting information**

Table S1. Primer sequences for target genes used for qPCR

| No. | Gene name | Forward | Reverse |
| --- | --- | --- | --- |
| 1 | IL-6 | ACTCACCTCTTCAGAACGAATTG | CCATCTTTGGAAGGTTCAGGTTG |
| 2 | TNF-α | CCTCTCTCTAATCAGCCCTCTG | GAGGACCTGGGAGTAGATGAG |
| 3 | Wnt 7B | CACAGAAACTTTCGCAAGTGG | GTACTGGCACTCGTTGATGC |
| 4 | CSNK1A1 | AGTGGCAGTGAAGCTAGAATCT | CGCCCAATACCCATTAGGAAGTT |
| 5 | TLE3 | AACCACCATGAACTCGATCAC | TCACTGTCGTATCGGCTCAAG |
| 6 | FZD | GTCTTTCAGTCAAGAGACGCTG | GTTGTGGTCGTTCTGTGGTG |
| 7 | LRP6 | TGTCAGCGAAGAAGCCATTAAA | TCTAAGGCAATAGCTCTGGGT |
| 8 | PP2A | CCGGGTGGATGACCAAATAGC | GAACTGCCCCAGATGAAGGG |
| 9 | β-catenin | CATCTACACAGTTTGATGCTGCT | GCAGTTTTGTCAGTTCAGGGA |


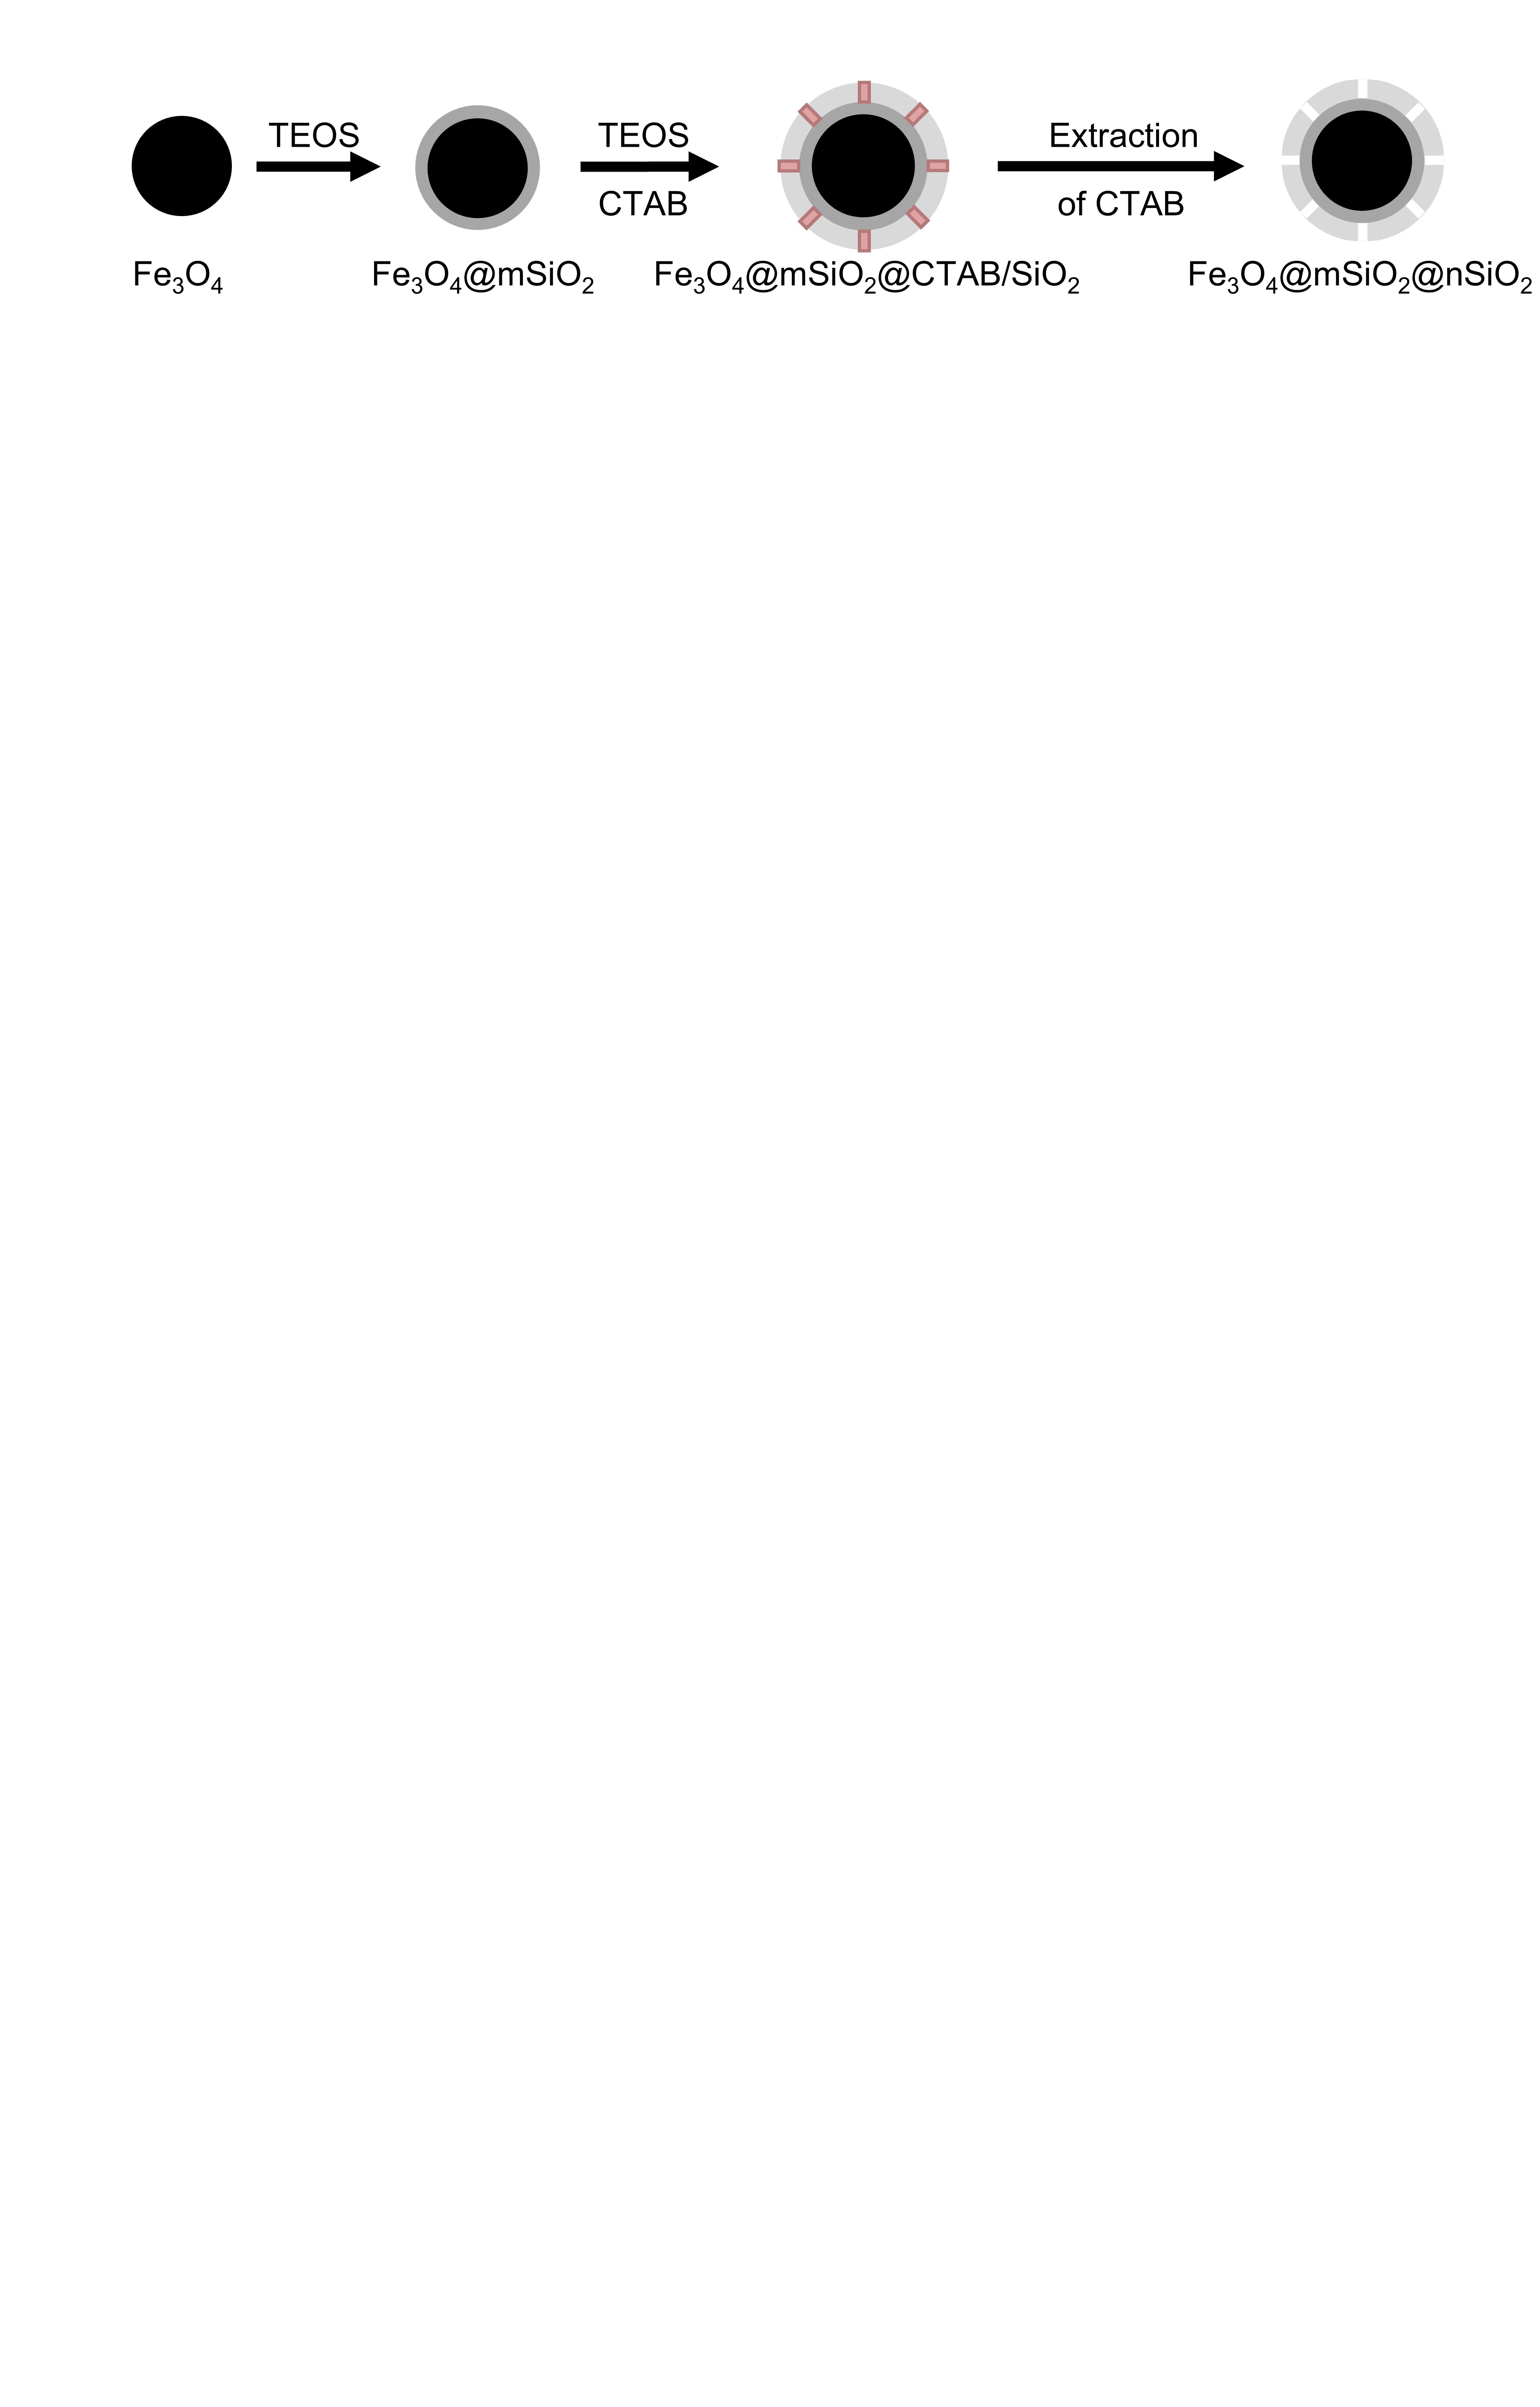


SI 1. The formation of mesoporous nanoparticles.


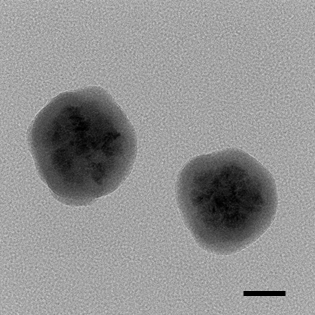


SI 2. The TEM image of Fe3O4@mSiO2 (scale bar: 50 nm).


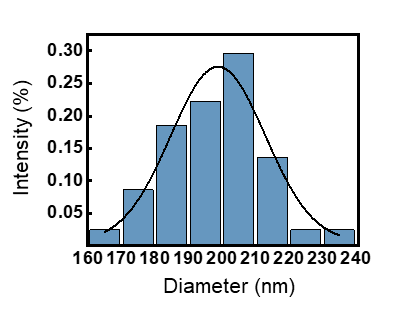


SI 3. Size distribution of rPMP.


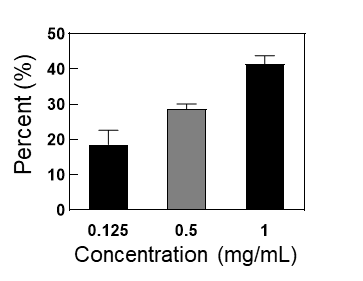


SI 4. Encapsulation efficiency of MMN.


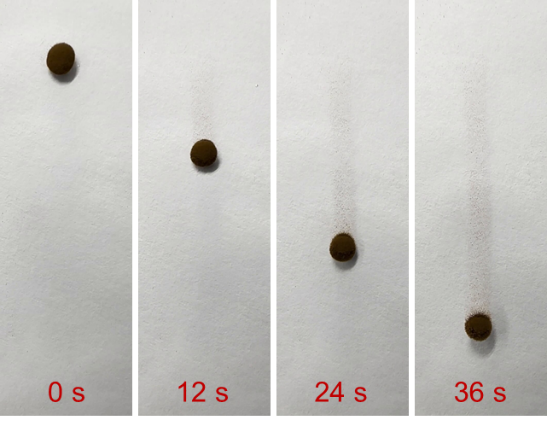


SI 5. Manipulation of nanomotors in 4 cP fluid.


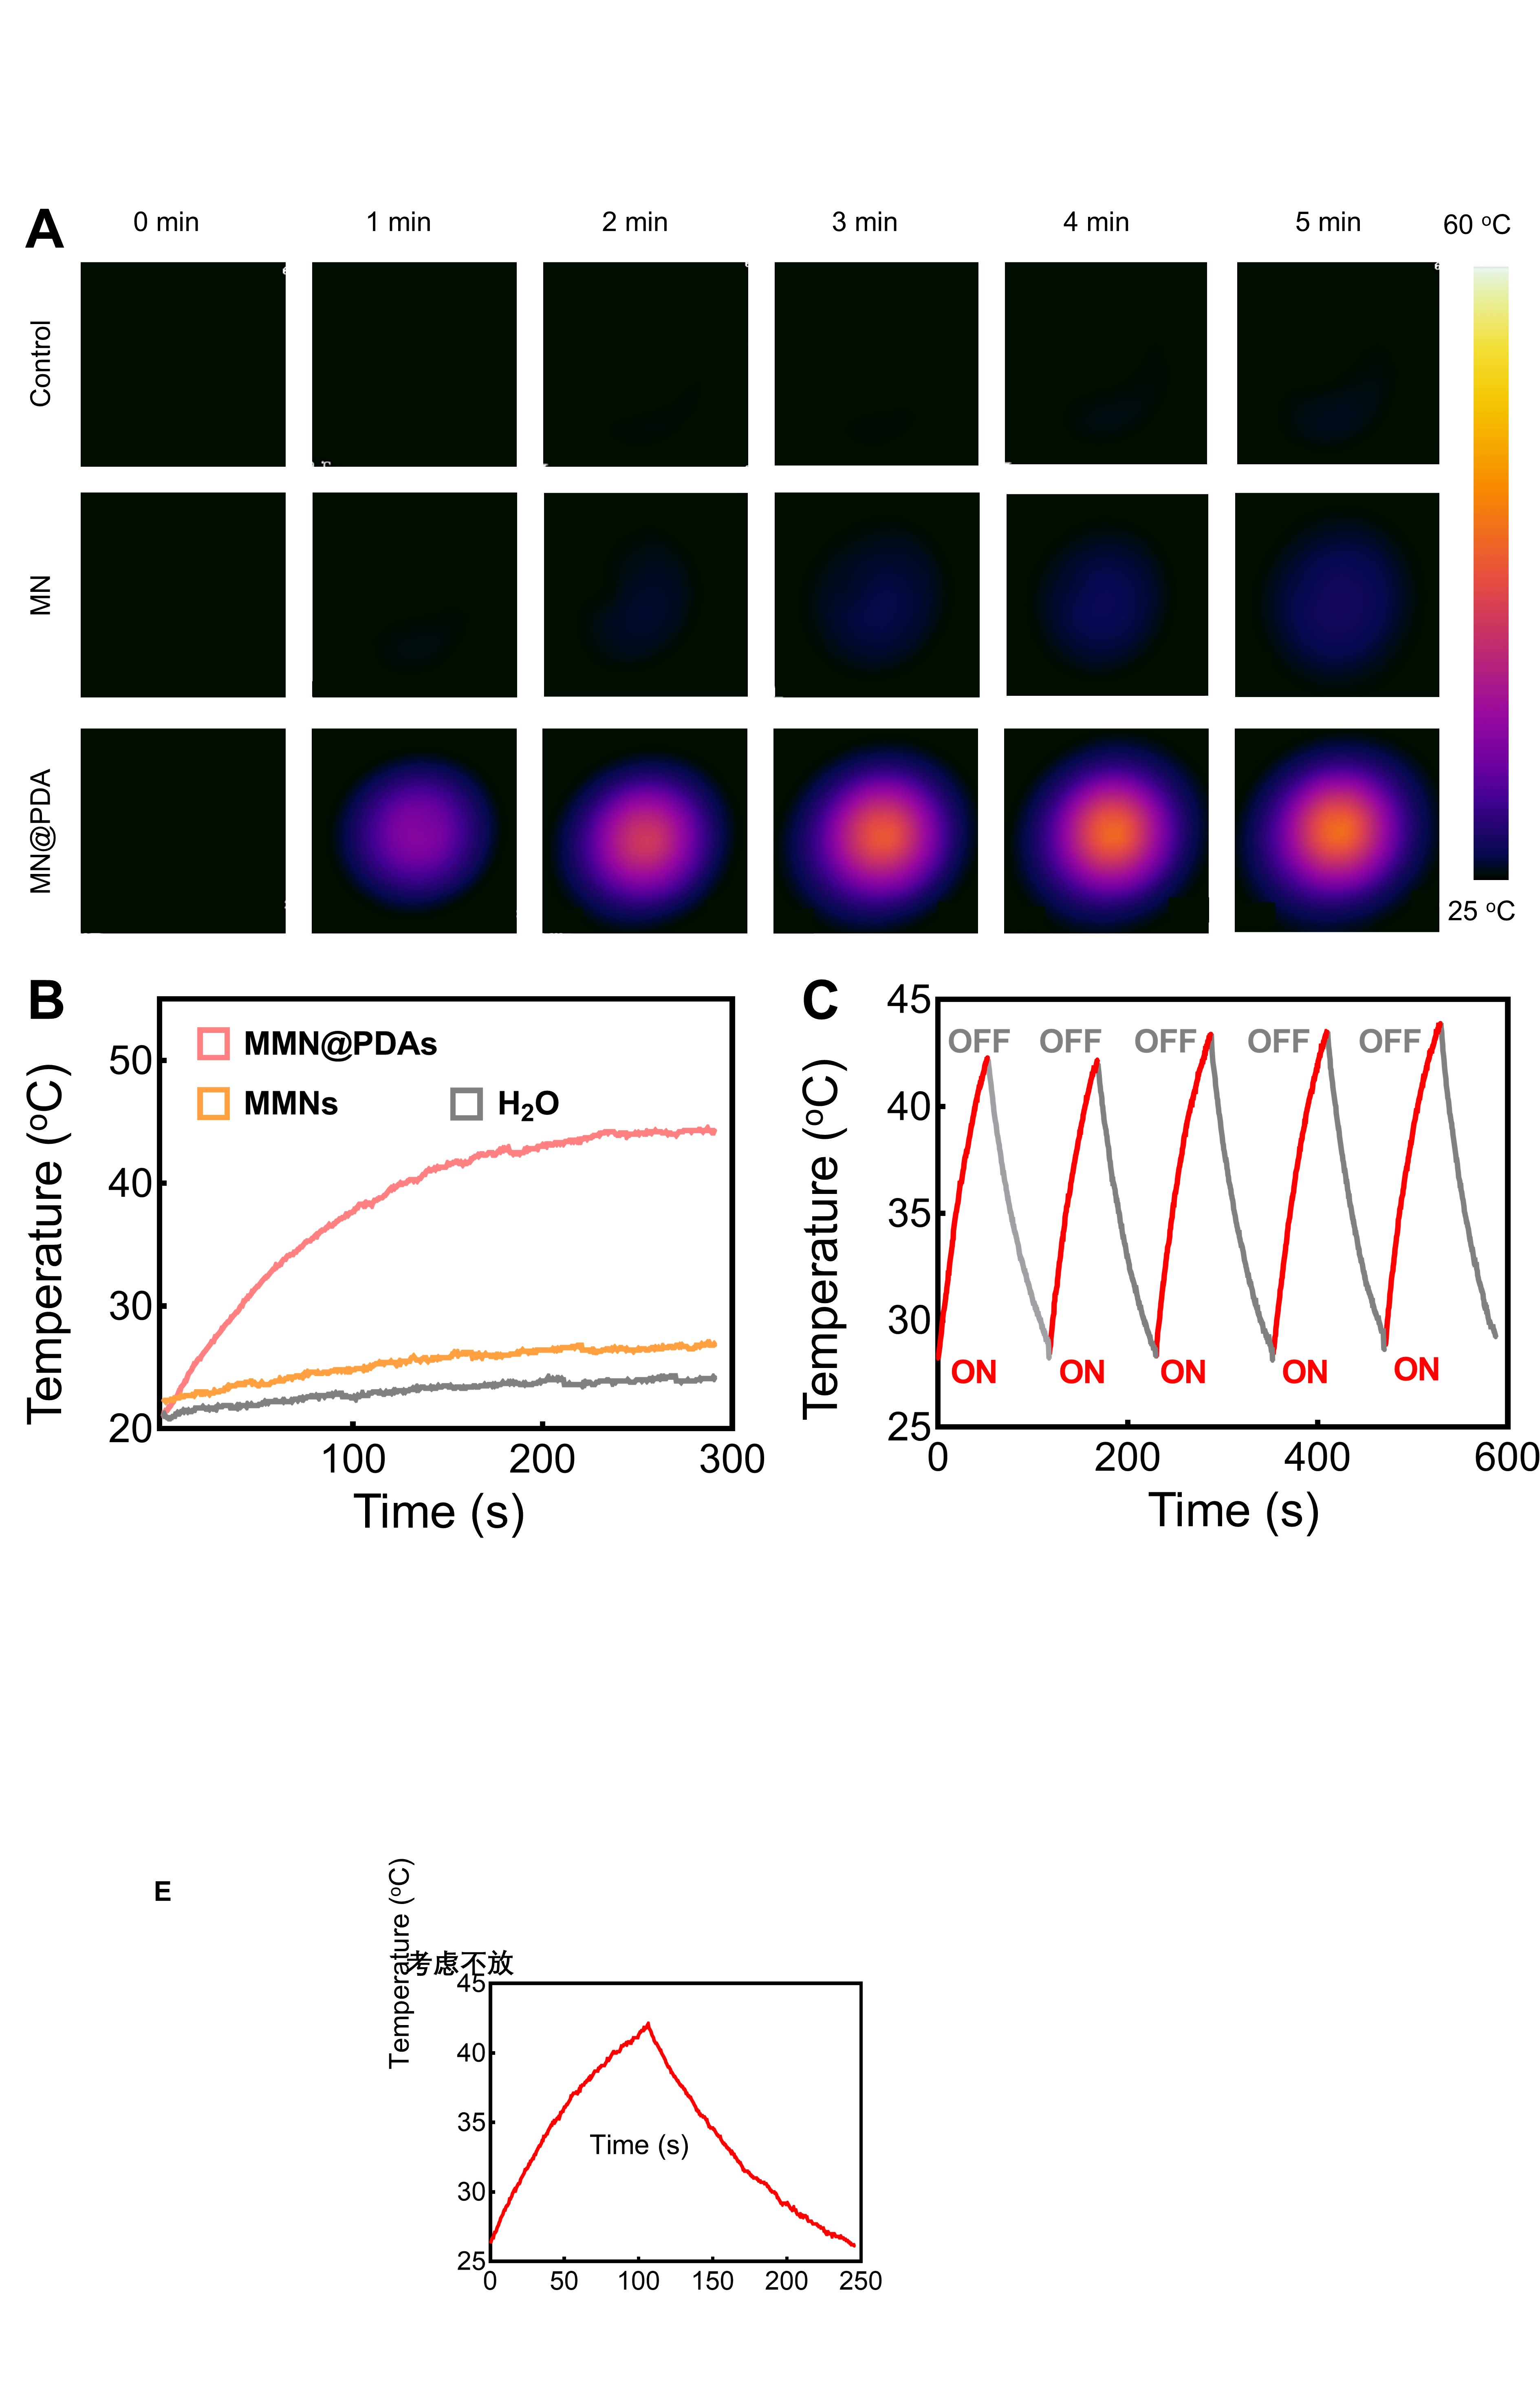


**SI 6. *In vitro* photothermal capability of MMN@PDA.** (A-B) Infrared thermal images (A) and temperature increase curves (B) of Control, MMN, and MMN@PDA (2.5 W/cm2). (C) Thermal stability of MMN@PDA during five heating-cooling cycles.


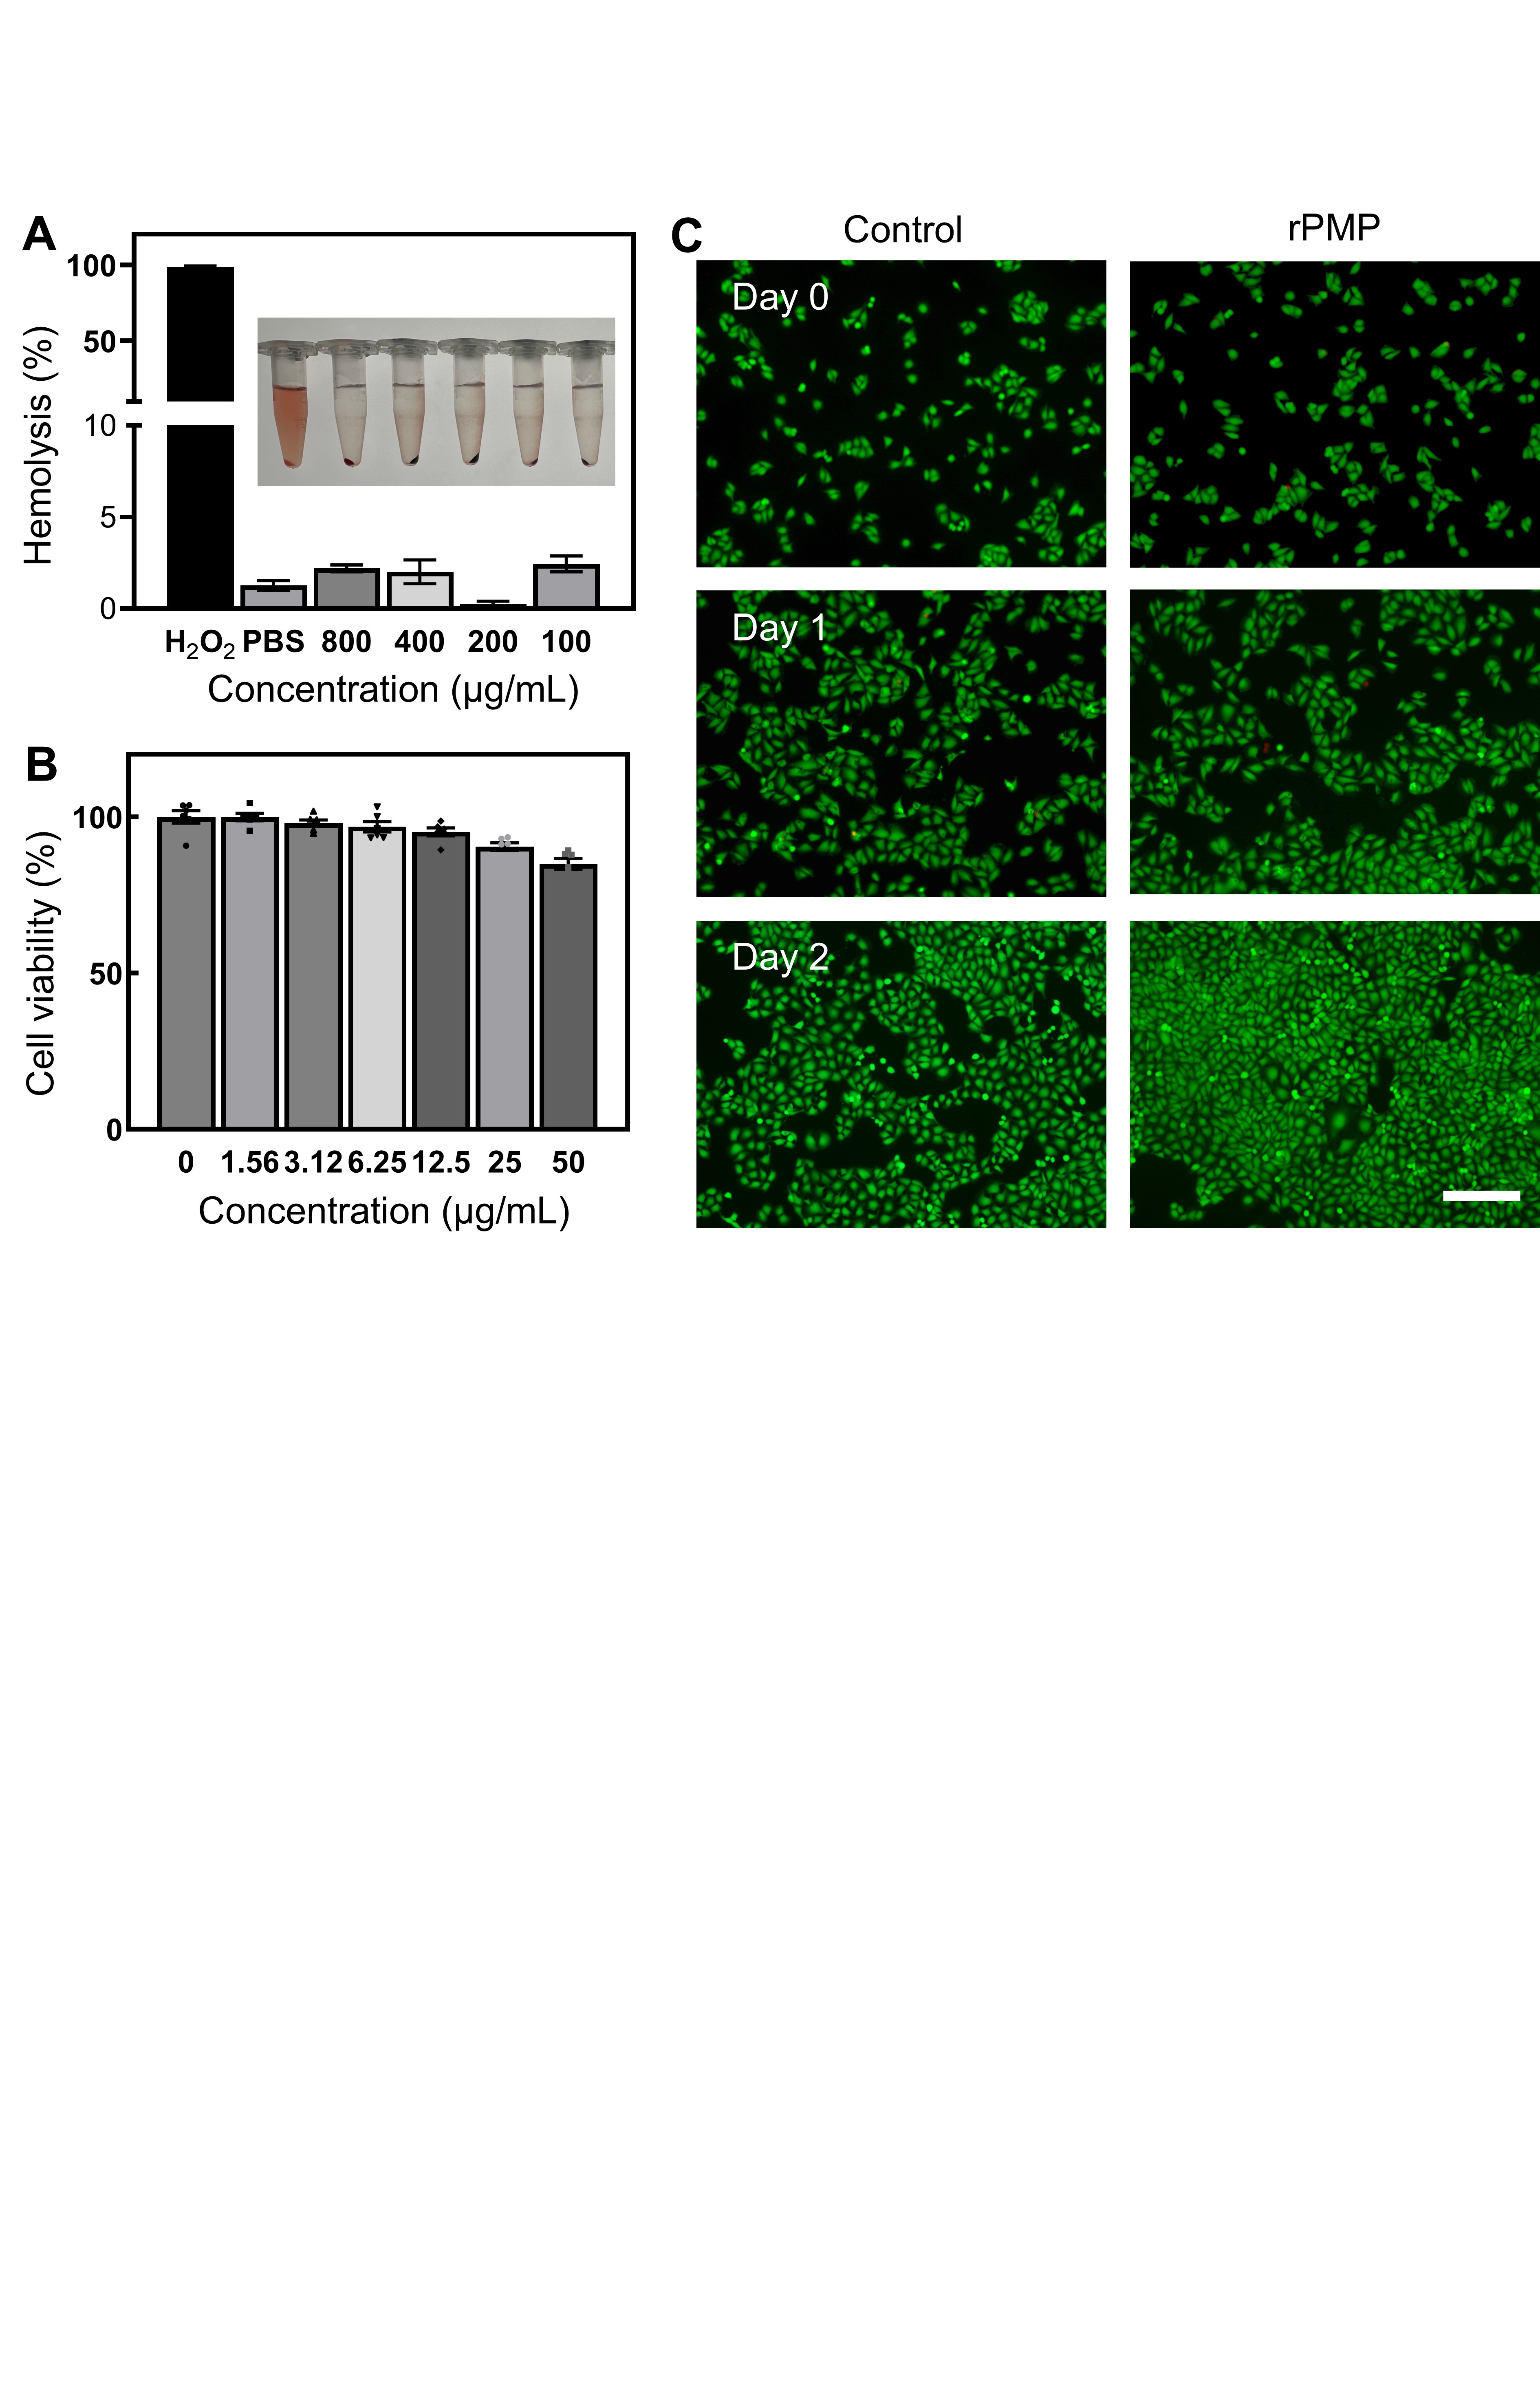


**SI 7. The biocompatibility of rPMP.** (A) Hemolysis test results of rPMP (n = 6). (B) The viability of HUVECs co-cultured with rPMP was measured by CCK-8 (n = 3). (C) The living/dead fluorescence images of HUVECs cocultured with rPMP (scale bar = 200 μm).


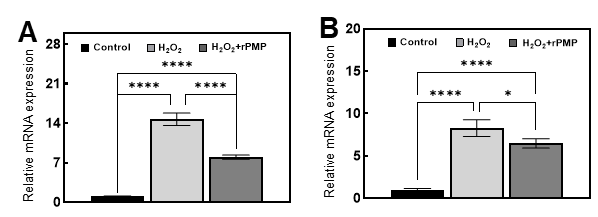


SI 8. qPCR results of IL-6 (A) and TNF-α (B).


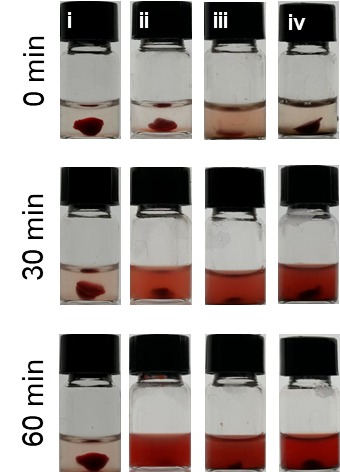


SI 9. Photographs of the residual thrombus (i: PBS + NIR, ii: rt-PA + NIR, iii: rt-PA/MMN + NIR, iv: rPMP + NIR).


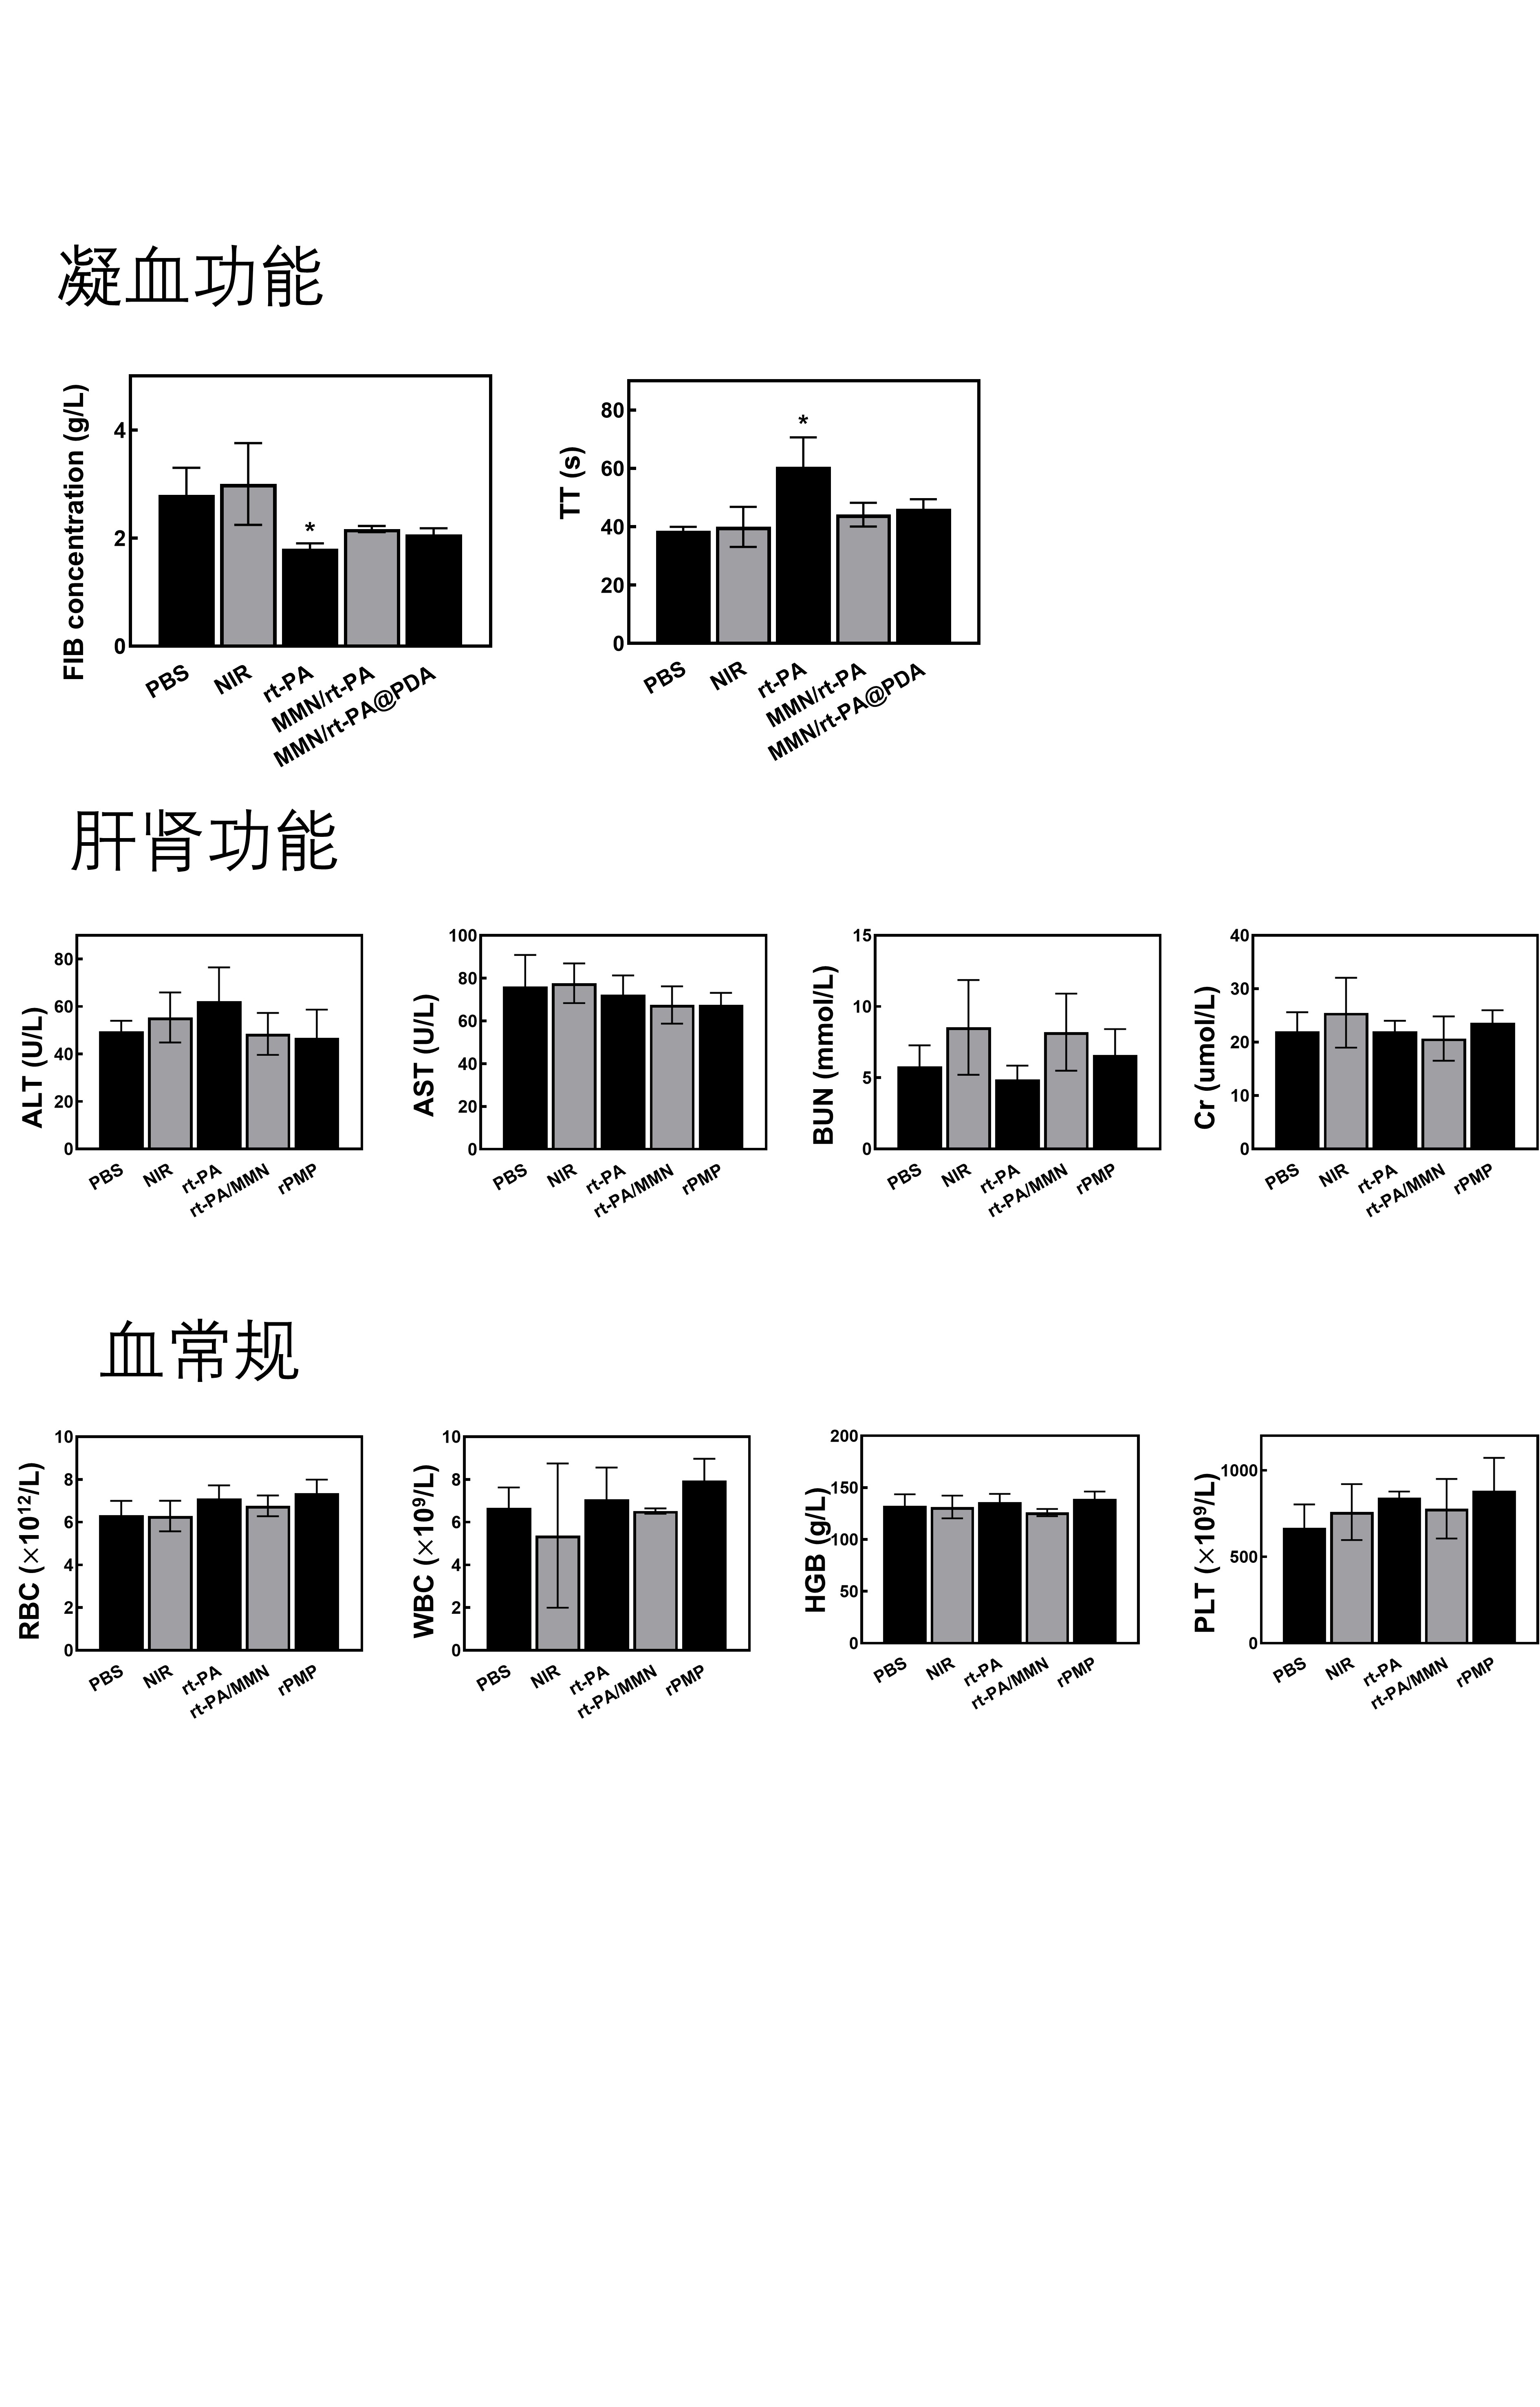


SI 10. Quantification of blood biochemistry test at 24 h after treatment with different.


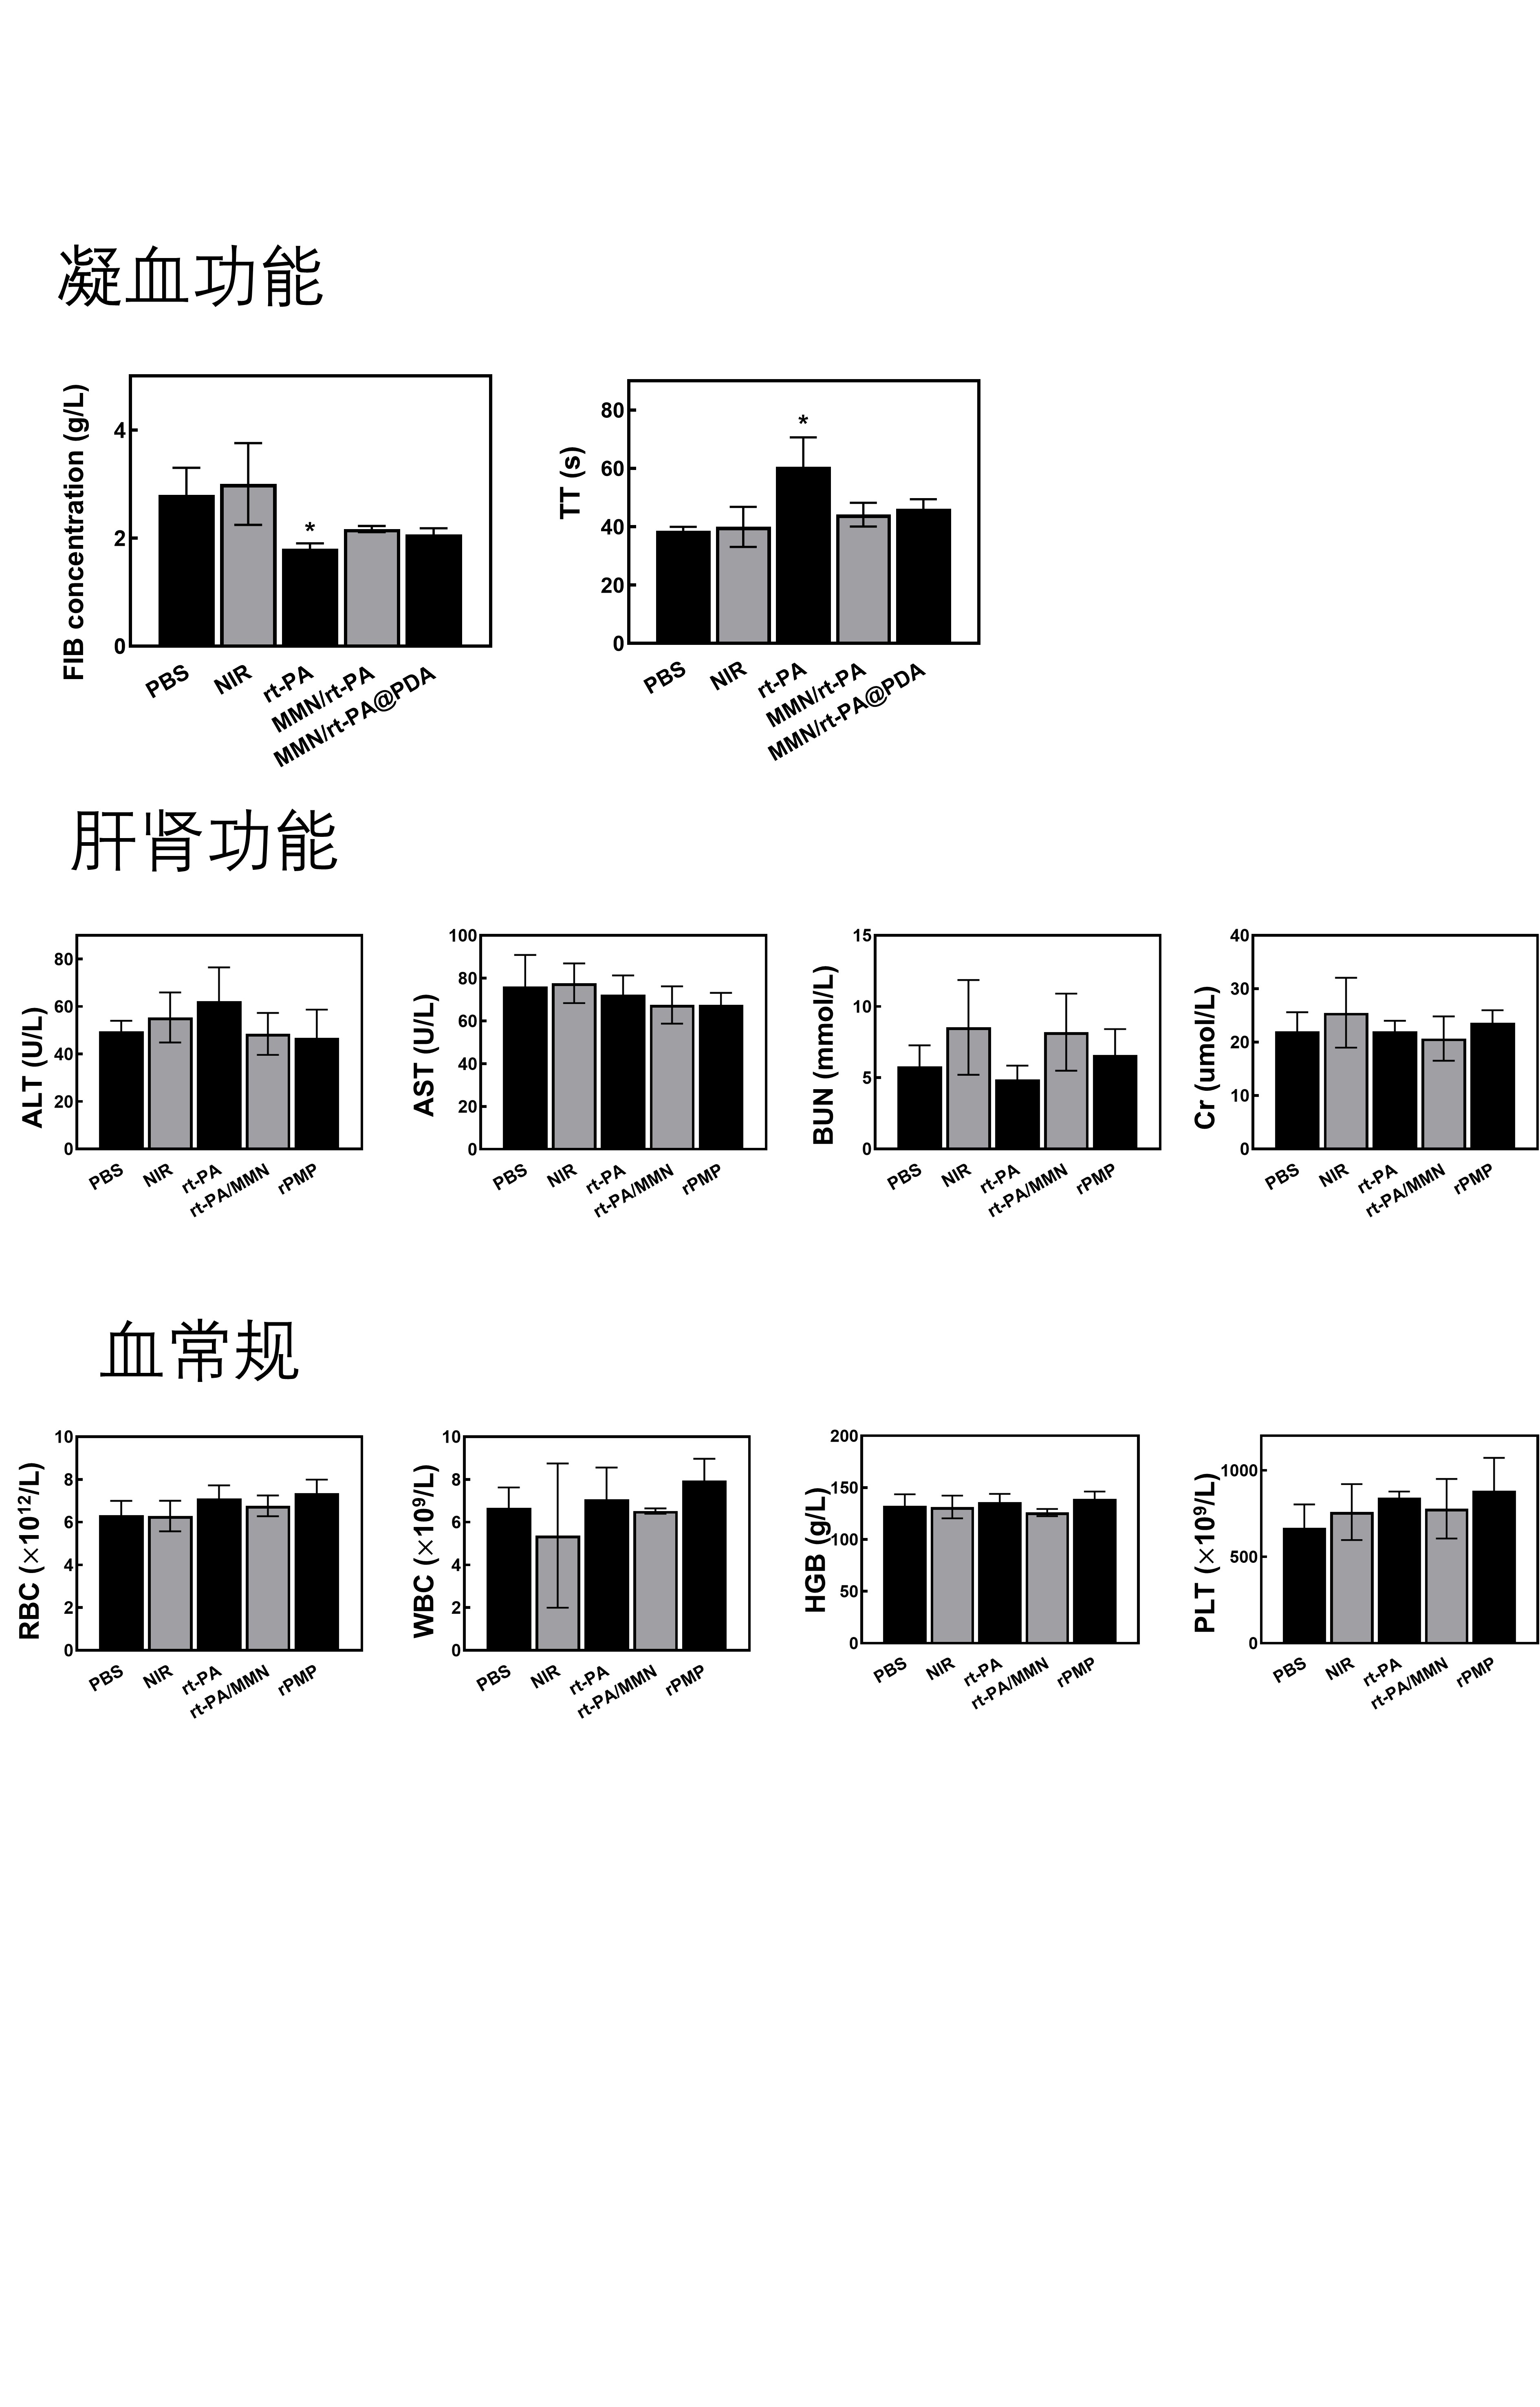


SI 11. Quantification of typical hematological parameters at 24 h after treatment with different samples.


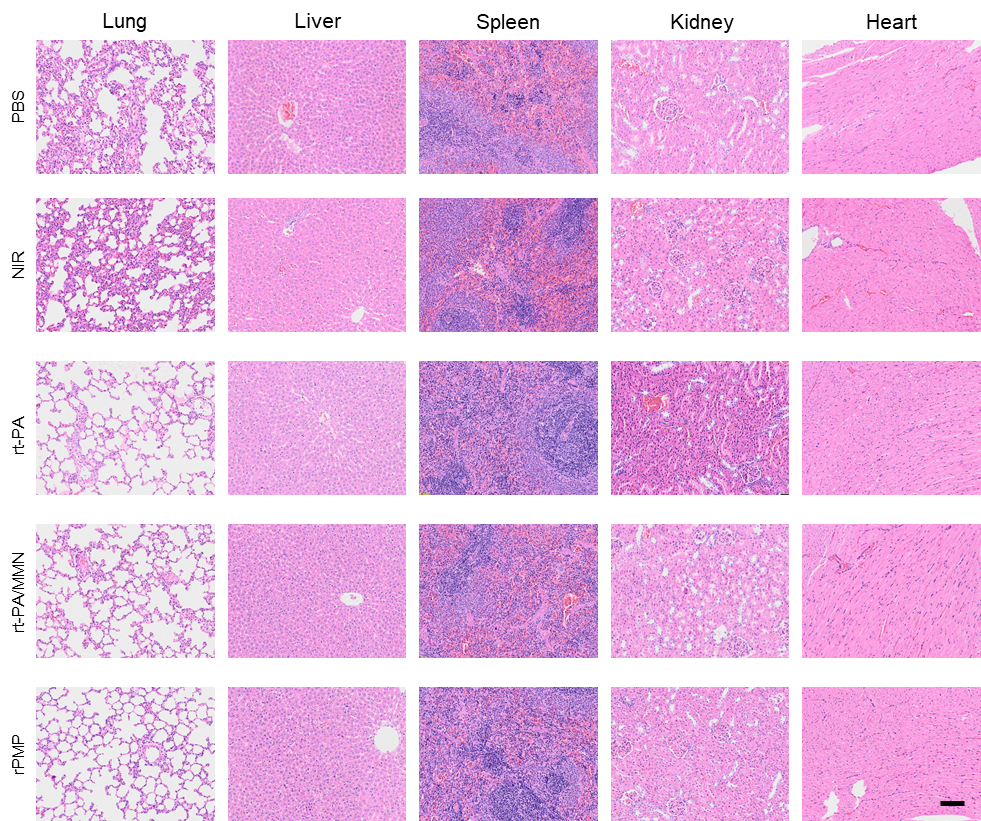


SI 12. H&E staining of major organs (scale bar: 100 μm).
